# Supplementary material for: Planned cesarean section vs planned vaginal delivery among women without formal medical indication for planned cesarean section: A retrospective cohort study of maternal short‐term complications
Source: PubMed Central journal article supplement — Acta Obstet Gynecol Scand. 2022 Jul 15;101(9):1026–32. doi: 10.1111/aogs.14408 (PMC9564441; doi:10.1111/aogs.14408), 2022-07-15
Supplement: AOGS-101-1026-s001.pdf [file AOGS-101-1026-s001.pdf]

S1. Maternal characteristics among women with planned CS and planned vaginal delivery, regardless of presence of indication for elective CS or antenatal conditions.

|                                   | Total   | Planned caesarean section |        | Planned vaginal delivery |        | p-value (X <sup>2</sup> ) |
|-----------------------------------|---------|---------------------------|--------|--------------------------|--------|---------------------------|
|                                   | N       | n                         | (%)    | n                        | (%)    |                           |
| Total births                      | 1111211 | 82837                     | (7.5)  | 1028374                  | (92.5) |                           |
| Maternal age (years)              |         |                           |        |                          |        | <0.001                    |
| <20                               | 15387   | 397                       | (2.6)  | 14990                    | (97.4) |                           |
| 20-34                             | 852149  | 51504                     | (6.0)  | 800645                   | (94.0) |                           |
| 35-39                             | 198453  | 23444                     | (11.8) | 175009                   | (88.2) |                           |
| 40+                               | 45222   | 7492                      | (16.6) | 37730                    | (83.4) |                           |
| Parity                            |         |                           |        |                          |        | <0.001                    |
| 1 para                            | 493737  | 24376                     | (4.9)  | 469361                   | (95.1) |                           |
| 2 para                            | 405118  | 36383                     | (9.0)  | 368735                   | (91.0) |                           |
| 3+ para                           | 212356  | 22078                     | (10.4) | 190278                   | (89.6) |                           |
| Maternal BMI (kg/m <sup>2</sup> ) |         |                           |        |                          |        | <0.001                    |
| <18.5                             | 26036   | 1529                      | (5.9)  | 24507                    | (94.1) |                           |
| 18.5-24.9                         | 613372  | 41639                     | (6.8)  | 571733                   | (93.2) |                           |
| 25-29.9                           | 265233  | 21442                     | (8.1)  | 243791                   | (91.9) |                           |
| 30-34.9                           | 95921   | 8776                      | (9.1)  | 87145                    | (90.9) |                           |
| 35+                               | 40775   | 4217                      | (10.3) | 36558                    | (89.7) |                           |
| BMI not known                     | 69874   | 5234                      | (7.5)  | 64640                    | (92.5) |                           |
| Maternal smoking                  |         |                           |        |                          |        | <0.001                    |
| Non-smoking                       | 1002854 | 75392                     | (7.5)  | 927462                   | (92.5) |                           |
| Smoking                           | 61579   | 4277                      | (6.9)  | 57302                    | (93.1) |                           |
| Not known                         | 46778   | 3168                      | (6.8)  | 43610                    | (93.2) |                           |
| Maternal height                   |         |                           |        |                          |        | <0.001                    |
| <155                              | 39118   | 4312                      | (11.0) | 34806                    | (89.0) |                           |
| 155-164                           | 387023  | 30549                     | (7.9)  | 356474                   | (92.1) |                           |
| 165-174                           | 534223  | 37641                     | (7.0)  | 496582                   | (93.0) |                           |
| 175+                              | 106152  | 7243                      | (6.8)  | 98909                    | (93.2) |                           |
| Not known                         | 44695   | 3092                      | (6.9)  | 41603                    | (93.1) |                           |
| Maternal country of birth         |         |                           |        |                          |        | <0.001                    |
| Nordic country                    | 934952  | 68939                     | (7.4)  | 866013                   | (92.6) |                           |
| Outside Nordics                   | 176259  | 13898                     | (7.9)  | 162361                   | (92.1) |                           |
| Health care region                |         |                           |        |                          |        | <0.001                    |
| Stockholm                         | 284171  | 28579                     | (10.1) | 255592                   | (89.9) |                           |
| Uppsala/Örebro                    | 213417  | 15423                     | (7.2)  | 197994                   | (92.8) |                           |
| Southeast                         | 112916  | 6614                      | (5.9)  | 106302                   | (94.1) |                           |
| South                             | 202511  | 13090                     | (6.5)  | 189421                   | (93.5) |                           |
| West                              | 207104  | 13229                     | (6.4)  | 193875                   | (93.6) |                           |
| North                             | 91092   | 5902                      | (6.5)  | 85190                    | (93.5) |                           |

S2. Risk of miscellaneous maternal post-partum complications. Planned CS vs planned vaginal delivery, regardless of presence of indication for elective CS or antenatal conditions. Adjusted RRs (ARRs) were computed adjusting for maternal age, parity, smoking, Body Mass Index, country of birth, and county.

|                         | Elective CS N=82 837 |              | Vaginal trial of labor<br>N=1 028 374 |              | Crude Risk Ratio |       |     | Adjusted Risk Ratio |       |     |
|-------------------------|----------------------|--------------|---------------------------------------|--------------|------------------|-------|-----|---------------------|-------|-----|
|                         | N                    | Per thousand | n                                     | Per thousand | RR               | 95%CI |     | ARR                 | 95%CI |     |
| Post-partum infections  |                      |              |                                       |              |                  |       |     |                     |       |     |
| Any*                    | 13402                | (161.8)      | 115418                                | (112.2)      | 1.4              | 1.4   | 1.5 | 1.4                 | 1.4   | 1.4 |
| Endometritis            | 1535                 | (18.5)       | 16845                                 | (16.4)       | 1.1              | 1.1   | 1.2 | 1.1                 | 1.1   | 1.2 |
| Wound infection         | 1586                 | (19.1)       | 7095                                  | ( 6.9)       | 2.8              | 2.6   | 2.9 | 2.6                 | 2.5   | 2.7 |
| Urinary tract infection | 858                  | (10.4)       | 7297                                  | ( 7.1)       | 1.5              | 1.4   | 1.6 | 1.4                 | 1.3   | 1.5 |
| Mastitis                | 3058                 | (36.9)       | 23460                                 | (22.8)       | 1.6              | 1.6   | 1.7 | 1.5                 | 1.5   | 1.6 |
| Septicaemia             | 25                   | (0.3)        | 293                                   | (0.3)        | 1.1              | 0.7   | 1.6 | 1.0                 | 0.6   | 1.5 |
| Antibiotics 0-14 days   | 6747                 | (81.4)       | 66063                                 | (64.2)       | 1.3              | 1.2   | 1.3 | 1.3                 | 1.2   | 1.3 |
| Antibiotics 0-42 days   | 11060                | (133.5)      | 101427                                | (98.6)       | 1.4              | 1.3   | 1.4 | 1.3                 | 1.3   | 1.4 |
| Other complications     |                      |              |                                       |              |                  |       |     |                     |       |     |
| Haemorrhage >1L         | 7219                 | (87.1)       | 13103                                 | (12.7)       | 6.8              | 6.7   | 7.0 | 6.2                 | 6.0   | 6.4 |
| Venous thrombosis       | 27                   | ( 0.3)       | 229                                   | ( 0.2)       | 1.5              | 1.0   | 2.2 | 1.4                 | 0.9   | 2.1 |
| Stroke                  | 14                   | ( 0.2)       | 101                                   | ( 0.1)       | 1.7              | 1.0   | 3.0 | 1.6                 | 0.9   | 2.8 |
| Pulmonary embolism      | 98                   | ( 1.2)       | 601                                   | ( 0.6)       | 2.0              | 1.6   | 2.5 | 1.7                 | 1.4   | 2.1 |

\* Endometritis, wound infection, urinary tract infection, mastitis, septicaemia, prescribed and dispensed antibiotics within six weeks

S3. Maternal characteristics and mode of delivery among women with planned vaginal delivery – regardless of presence of indication for elective CS or antenatal conditions.

|                                   | Trial of labour, | Vaginal-nonInstr | Emergency CS  | VE           | Forceps    |
|-----------------------------------|------------------|------------------|---------------|--------------|------------|
|                                   | Total            |                  |               |              |            |
|                                   | N                | n (%)            | n (%)         | n (%)        | n (%)      |
| Total births                      | 1028374          | 847985 (82.5)    | 108458 (10.5) | 70608 (6.9)  | 1323 (0.1) |
| Maternal age (years)              |                  |                  |               |              |            |
| <20                               | 14990            | 12828 (85.6)     | 1116 (7.4)    | 1023 (6.8)   | 23 (0.2)   |
| 20-34                             | 800645           | 665581 (83.1)    | 77913 (9.7)   | 56089 (7.0)  | 1062 (0.1) |
| 35-39                             | 175009           | 141099 (80.6)    | 22625 (12.9)  | 11094 (6.3)  | 191 (0.1)  |
| 40+                               | 37730            | 28477 (75.5)     | 6804 (18.0)   | 2402 (6.4)   | 47 (0.1)   |
| Parity                            |                  |                  |               |              |            |
| 1 para                            | 469361           | 346401 (73.8)    | 66026 (14.1)  | 55888 (11.9) | 1046 (0.2) |
| 2 para                            | 368735           | 327813 (88.9)    | 29105 (7.9)   | 11603 (3.1)  | 214 (0.1)  |
| 3+ para                           | 190278           | 173771 (91.3)    | 13327 (7.0)   | 3117 (1.6)   | 63 (0.0)   |
| Maternal BMI (kg/m <sup>2</sup> ) |                  |                  |               |              |            |
| <18.5                             | 24507            | 20758 (84.7)     | 1757 (7.2)    | 1947 (7.9)   | 45 (0.2)   |
| 18.5-24.9                         | 571733           | 478183 (83.6)    | 50590 (8.8)   | 42163 (7.4)  | 797 (0.1)  |
| 25-29.9                           | 243791           | 198579 (81.5)    | 29128 (11.9)  | 15811 (6.5)  | 273 (0.1)  |
| 30-34.9                           | 87145            | 69417 (79.7)     | 12831 (14.7)  | 4814 (5.5)   | 83 (0.1)   |
| 35+                               | 36558            | 28373 (77.6)     | 6363 (17.4)   | 1794 (4.9)   | 28 (0.1)   |
| BMI not known                     | 64640            | 52675 (81.5)     | 7789 (12.0)   | 4079 (6.3)   | 97 (0.2)   |
| Maternal smoking                  |                  |                  |               |              |            |
| Non-smoking                       | 927462           | 764593 (82.4)    | 96762 (10.4)  | 64925 (7.0)  | 1182 (0.1) |
| Smoking                           | 57302            | 47780 (83.4)     | 6232 (10.9)   | 3204 (5.6)   | 86 (0.2)   |
| Not known                         | 43610            | 35612 (81.7)     | 5464 (12.5)   | 2479 (5.7)   | 55 (0.1)   |
| Maternal height                   |                  |                  |               |              |            |
| <155                              | 34806            | 25108 (72.1)     | 6818 (19.6)   | 2834 (8.1)   | 46 (0.1)   |
| 155-164                           | 356474           | 284822 (79.9)    | 44860 (12.6)  | 26317 (7.4)  | 475 (0.1)  |

|                           |        |               |              |             |            |
|---------------------------|--------|---------------|--------------|-------------|------------|
| 165-174                   | 496582 | 418548 (84.3) | 44453 (9.0)  | 32978 (6.6) | 603 (0.1)  |
| 175+                      | 98909  | 85749 (86.7)  | 7005 (7.1)   | 6014 (6.1)  | 141 (0.1)  |
| Not known                 | 41603  | 33758 (81.1)  | 5322 (12.8)  | 2465 (5.9)  | 58 (0.1)   |
| Maternal country of birth |        |               |              |             |            |
| Nordic country            | 866013 | 715202 (82.6) | 89620 (10.3) | 60050 (6.9) | 1141 (0.1) |
| Outside Nordics           | 162361 | 132783 (81.8) | 18838 (11.6) | 10558 (6.5) | 182 (0.1)  |
| Health care region        |        |               |              |             |            |
| Stockholm                 | 255592 | 203497 (79.6) | 31112 (12.2) | 20713 (8.1) | 270 (0.1)  |
| Uppsala/Örebro            | 197994 | 162595 (82.1) | 21292 (10.8) | 14050 (7.1) | 57 (0.0)   |
| Southeast                 | 106302 | 90304 (85.0)  | 9022 (8.5)   | 6896 (6.5)  | 80 (0.1)   |
| South                     | 189421 | 157156 (83.0) | 19338 (10.2) | 12331 (6.5) | 596 (0.3)  |
| West                      | 193875 | 163686 (84.4) | 19470 (10.0) | 10535 (5.4) | 184 (0.1)  |
| North                     | 85190  | 70747 (83.0)  | 8224 (9.7)   | 6083 (7.1)  | 136 (0.2)  |

---
